# Supplementary material
Source: PubMed Central journal article supplement (PMC8923186)

## Supplemental Figure Legends

Supplemental Figure 1. **Voriconazole resistance among *ERG11* mutations.** Mid-log phase *C. glabrata* strains containing the indicated *ERG11* alleles were serially diluted and spotted on YPD agar plates supplemented with various concentrations of voriconazole.

Supplemental Figure 2. **Interaction of DM *ERG11* allele and Pdr1.** A. The *PDR1* promoter was replaced with the *MET3* promoter in strains containing either the wild-type or DM *ERG11* allele. Strains were grown to mid-log phase and then serial dilutions plated on SC medium lacking or containing methionine. Fluconazole was added to these plates where indicated. Plates were incubated at 30°C and then photographed. B. The strains above were grown to mid-log phase in SC medium lacking methionine, methionine was either omitted (-) or added (+) and cultures allowed to continue to grow for equal times. Whole cell protein extracts were then prepared and analyzed by western blotting using the indicated antibodies.

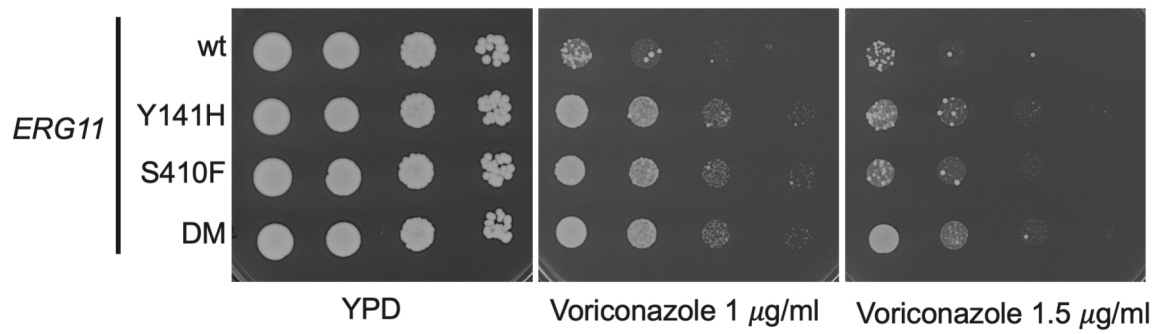

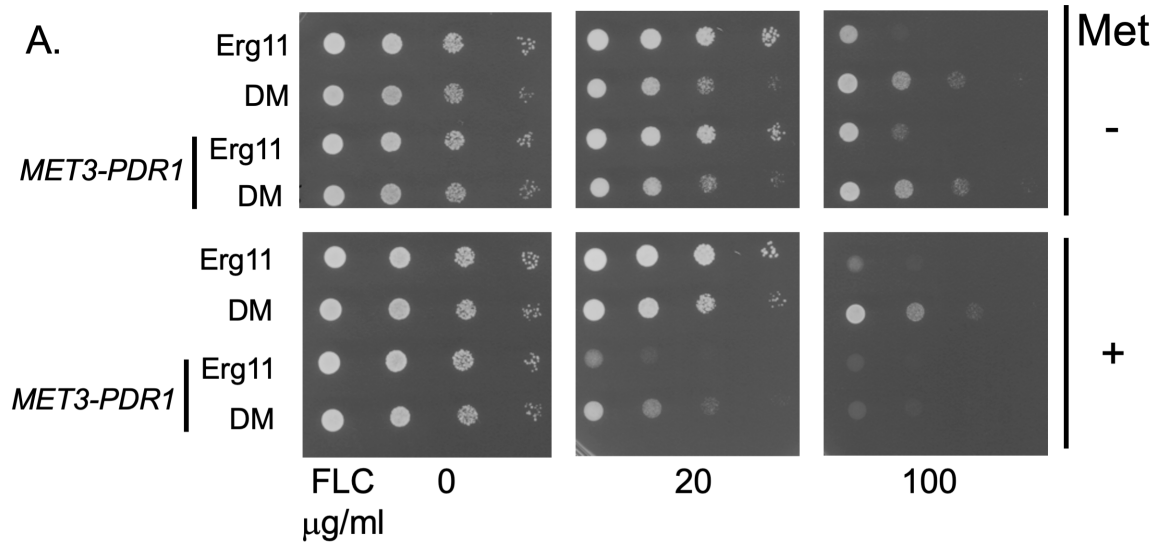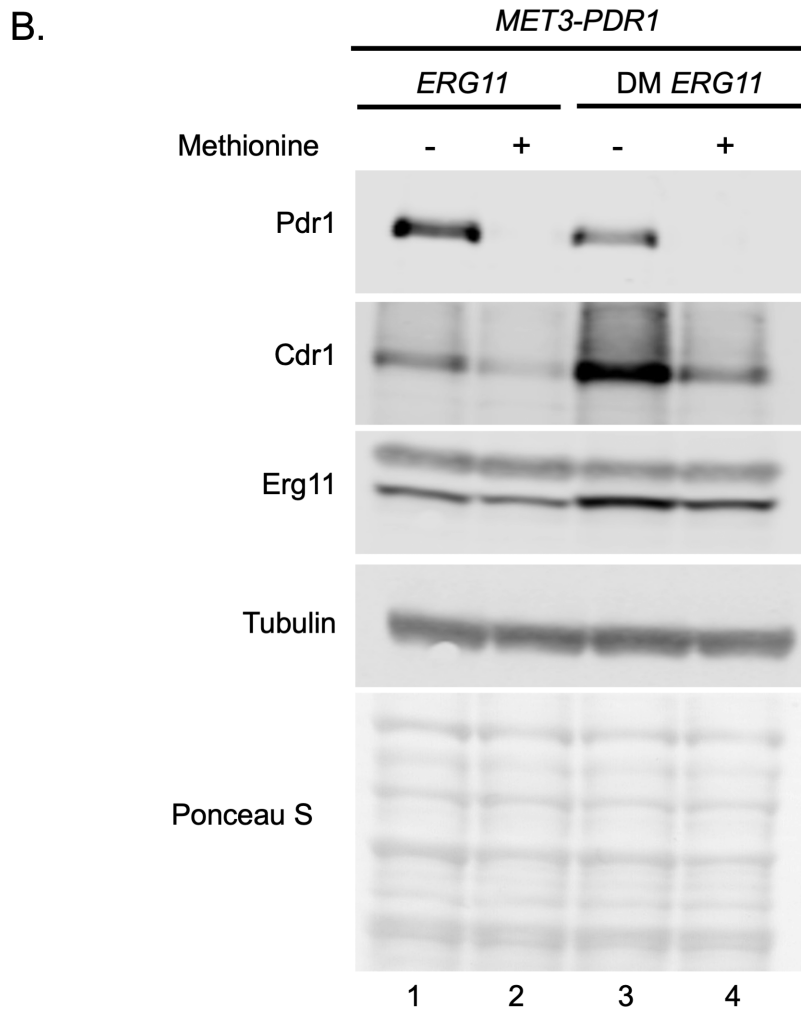

Supplement: aac.02098-21-s0001.pdf [file aac.02098-21-s0001.pdf]
